# Supplementary material for: MicroRNA Signatures Associated with Bronchopulmonary Dysplasia Severity in Tracheal Aspirates of Preterm Infants
Source: MDPI journal article supplement (doi:10.3390/biomedicines9030257), 2021-03-05
Supplement: s1 [file s1]

## Supplementary Material

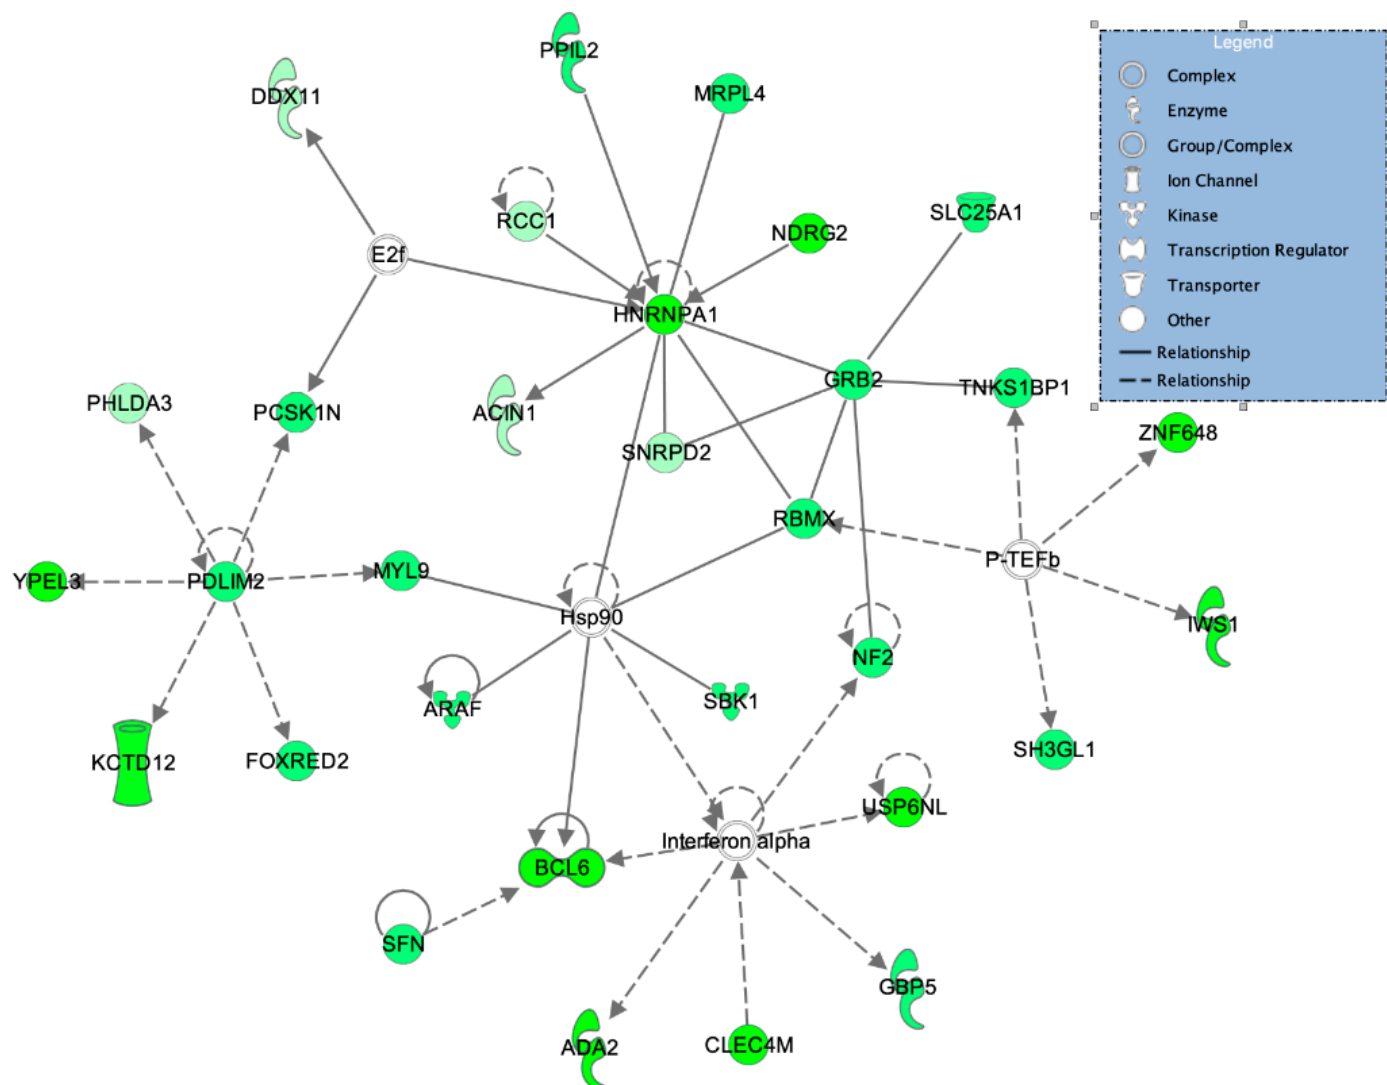

**Figure 1.** Respiratory disease, cancer, organismal injury and abnormalities network.

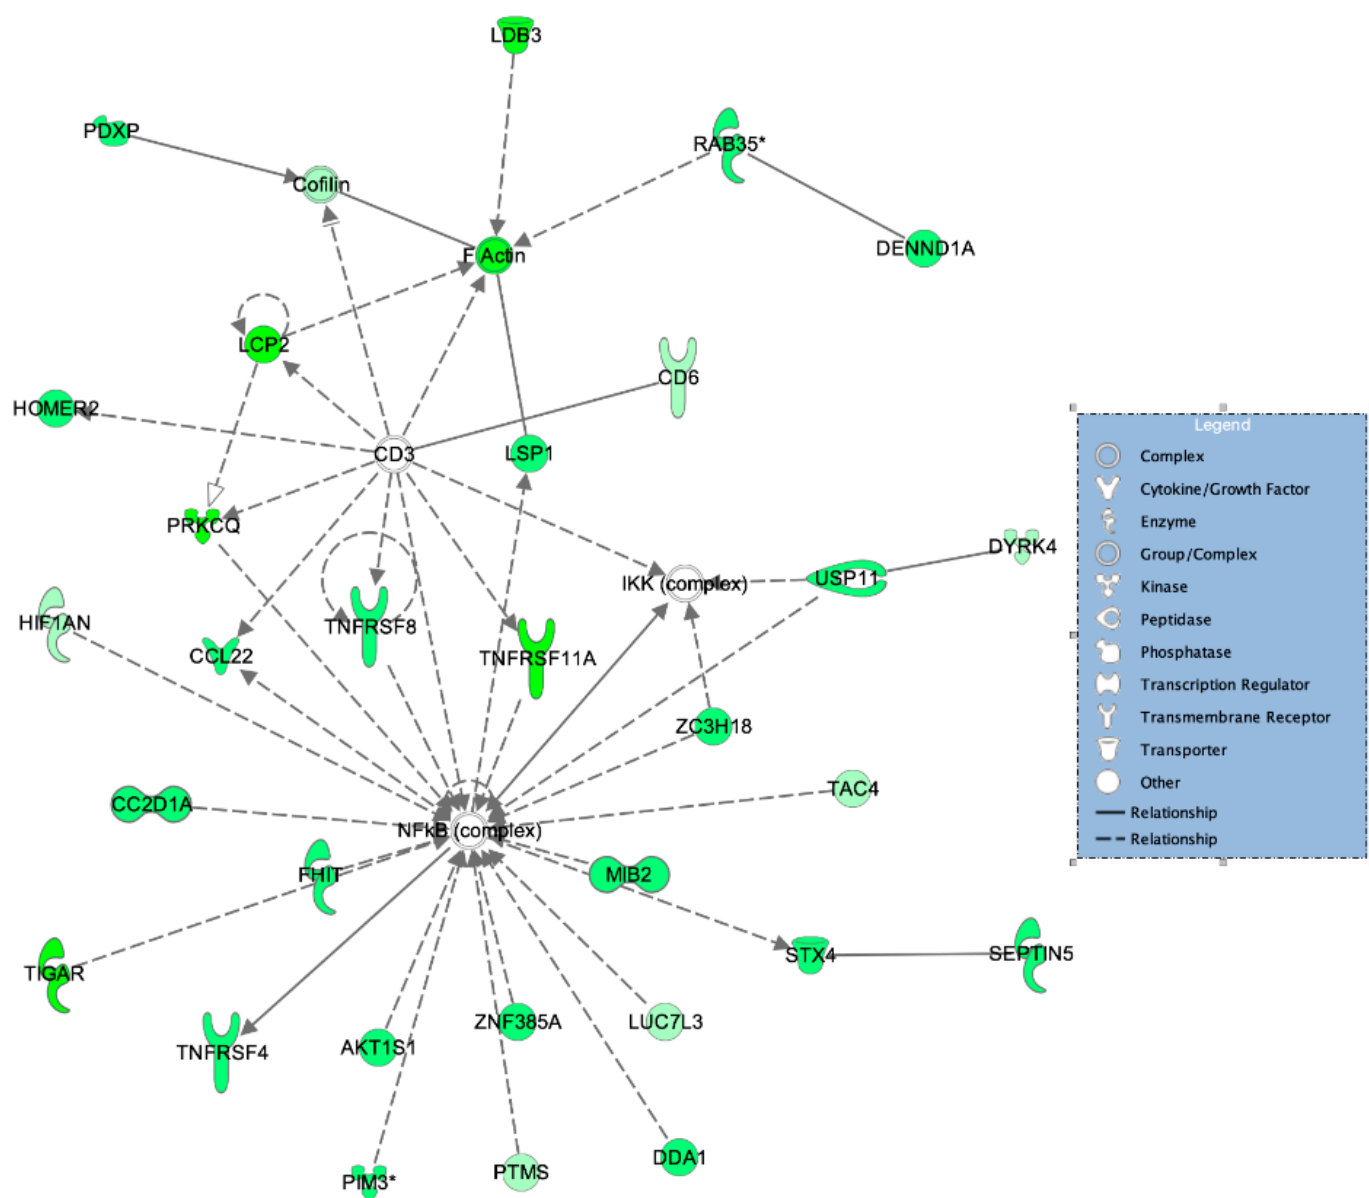

**Figure 2.** Cellular movement, immune cell trafficking, immunological disease network.
